# Supplementary material for: Lithium promotes recovery after spinal cord injury
Source: PubMed Central journal article supplement — Neural Regen Res. 2021 Nov 12;17(6):1324–33. doi: 10.4103/1673-5374.327348 (PMC8643056; doi:10.4103/1673-5374.327348), 2021-11-12
Supplement: NRR-17-1324_Suppl1.pdf [file NRR-17-1324_Suppl1.pdf]

## OPEN PEER REVIEW REPORT 1

**Name of journal:** Neural Regeneration Research

**Manuscript NO:** NRR-D-21-00269

**Title:** Lithium promotes spinal cord injury recovery in rats by inhibiting inflammatory mediators, oxidative stress, neuronal pyroptosis via Nrf2/HO-1 signaling pathway

**Reviewer's Name:** Michel Edwar-Mickael

**Reviewer's country:** Poland

### COMMENTS TO AUTHORS

This paper is nicely written and it investigates an important role of Lithium in reducing cell death by activating Nrf2. Overall the paper quality is high. However the resolution of most of the figures are not ideal.

Also, it will be interesting to report, if the authors have seen any side effect to their treatment and link it to what has been published in relation to this point, such as the effect of Chronic lithium use in reducing the kidney's ability to respond to ADH, after Li accumulation in the cells.
